# Supplementary material
Source: PubMed Central journal article supplement (PMC11406676)
Supplement: NIHMS2019453-supplement-supplemental.pdf [file NIHMS2019453-supplement-supplemental.pdf]

Supporting Table 1. Comparison of Rural-Urban Classification Indexes: United States, Midwest, and Wisconsin

|                           |                    |                                                       |                |           | Land Area (square miles) |            |              |            | Geographical Units |            |        |            | Total Population |            |            |            | Papers                                                                                   |
|---------------------------|--------------------|-------------------------------------------------------|----------------|-----------|--------------------------|------------|--------------|------------|--------------------|------------|--------|------------|------------------|------------|------------|------------|------------------------------------------------------------------------------------------|
|                           |                    |                                                       |                |           | Urban                    |            | Rural        |            | Urban              |            | Rural  |            | Urban            |            | Rural      |            |                                                                                          |
| Index                     | Geographical Unit  | Urban Codes                                           | Rural Codes    | Region    | Square Miles             | % of Total | Square Miles | % of Total | Count              | % of Total | Count  | % of Total | Total            | % of Total | Total      | % of Total |                                                                                          |
| UACE (2010)               | Census Blocks      | Urban Area Urban Cluster                              | None           | USA       | 106,386                  | 3.0%       | 3,425,519    | 97.0%      |                    |            |        |            | 249,253,271      | 80.7%      | 59,492,267 | 19.3%      | Johnson 2016 <sup>1</sup><br>Pruitt 2015 <sup>2</sup><br>Virani 2011 <sup>3</sup>        |
|                           |                    |                                                       |                | Midwest   | 23,013                   | 3.1%       | 727,510      | 96.9%      |                    |            |        |            | 50,771,646       | 75.9%      | 16,155,355 | 24.1%      |                                                                                          |
|                           |                    |                                                       |                | Wisconsin | 1,879                    | 3.5%       | 52,279       | 96.5%      |                    |            |        |            | 3,989,638        | 70.2%      | 1,697,348  | 29.9%      |                                                                                          |
| FAR (2010)                | ZIP/ 0.5^2 km grid | None                                                  | 1-4            | USA       | 1,725,471                | 48.0%      | 1,868,901    | 52.0%      | 25,008             | 82.4%      | 5,329  | 17.6%      | 296,083,828      | 96.1%      | 12,156,019 | 3.9%       | Pruitt 2015 <sup>2</sup>                                                                 |
|                           |                    |                                                       |                | Midwest   | 419,503                  | 54.7%      | 347,517      | 45.3%      | 7175               | 76.8%      | 2172   | 23.2%      | 62,923,209       | 94.1%      | 3,955,309  | 5.9%       |                                                                                          |
|                           |                    |                                                       |                | Wisconsin | 43,892                   | 78.2%      | 12,214       | 21.8%      | 629                | 86.8%      | 96     | 13.2%      | 5,497,147        | 96.8%      | 182,725    | 3.2%       |                                                                                          |
| RUCA (2010) (option 1)    | Census Tract       | 1-3                                                   | 4-10           | USA       | 847,792                  | 24.0%      | 2,683,986    | 76.0%      | 59,389             | 81.3%      | 13,390 | 18.3%      | 257,810,493      | 83.5%      | 50,935,045 | 16.5%      | Onega 2017 <sup>4</sup><br>Cetnar 2013 <sup>5</sup><br>White 2011 <sup>6</sup>           |
|                           |                    |                                                       |                | Midwest   | 170,061                  | 22.7%      | 580,432      | 77.3%      | 12604              | 74.1%      | 4409   | 25.9%      | 50,817,496       | 75.9%      | 16,109,505 | 24.1%      |                                                                                          |
|                           |                    |                                                       |                | Wisconsin | 15,689                   | 29.0%      | 38,469       | 71.0%      | 971                | 68.9%      | 423    | 30.0%      | 4,045,911        | 71.1%      | 1,641,075  | 28.9%      |                                                                                          |
| RUCA (2010) (option 2)    | Census Tract       | 1.0, 1.1, 2.0, 2.1, 3.0, 4.1, 5.1, 7.1, 8.1, and 10.1 | Others         | USA       | 921,261                  | 26.1%      | 2,610,517    | 73.9%      | 60,026             | 82.5%      | 12,753 | 17.5%      | 260,671,526      | 84.4%      | 48,074,012 | 15.6%      | Bradley 2020 <sup>7</sup><br>Yaghjian 2019                                               |
|                           |                    |                                                       |                | Midwest   | 184,952                  | 24.6%      | 565,542      | 75.4%      | 12743              | 74.9%      | 4270   | 25.1%      | 51,408,846       | 76.8%      | 15,518,155 | 23.2%      |                                                                                          |
|                           |                    |                                                       |                | Wisconsin | 16,483                   | 30.4%      | 37,675       | 69.6%      | 987                | 70.8%      | 407    | 29.2%      | 4,124,850        | 72.5%      | 1,562,136  | 27.5%      |                                                                                          |
| RUCA(z) (2013) (option 1) | ZCTA               | 1-3                                                   | 4-10           | USA       |                          |            |              |            | 24,497             | 59.7%      | 16,553 | 40.3%      |                  |            |            |            | Hung 2020 <sup>8</sup><br>Onega 2019<br>Kinney 2016 <sup>9</sup>                         |
|                           |                    |                                                       |                | Midwest   |                          |            |              |            | 5362               | 47.1%      | 6031   | 52.9%      |                  |            |            |            |                                                                                          |
|                           |                    |                                                       |                | Wisconsin |                          |            |              |            | 408                | 45.6%      | 487    | 54.4%      |                  |            |            |            |                                                                                          |
| RUCA(z) (2013) (option 2) | ZCTA               | 1.0, 1.1, 2.0, 2.1, 3.0, 4.1, 5.1, 7.1, 8.1, and 10.1 | Others         | USA       |                          |            |              |            | 28,277             | 68.9%      | 12,773 | 31.1%      |                  |            |            |            | Rogers 2020 <sup>10</sup><br>Freeman 2019 <sup>11</sup><br>Markossian 2016 <sup>12</sup> |
|                           |                    |                                                       |                | Midwest   |                          |            |              |            | 6496               | 57.0%      | 4897   | 43.0%      |                  |            |            |            |                                                                                          |
|                           |                    |                                                       |                | Wisconsin |                          |            |              |            | 521                | 58.2%      | 374    | 41.8%      |                  |            |            |            |                                                                                          |
| RUCC (2013)               | County             | 1-3                                                   | 4-9            | USA       | 978,308                  | 27.7%      | 2,553,597    | 72.3%      | 1,167              | 37.1%      | 1,976  | 62.9%      | 262,452,132      | 85.1%      | 43,293,406 | 15.0%      | Gosain 2019 <sup>13</sup><br>Zahnd 2018 <sup>14</sup><br>Blake 2017 <sup>15</sup>        |
|                           |                    |                                                       |                | Midwest   | 182,601                  | 24.3%      | 567,922      | 75.7%      | 302                | 28.6%      | 753    | 71.4%      | 51,690,737       | 77.2%      | 15,236,264 | 22.8%      |                                                                                          |
|                           |                    |                                                       |                | Wisconsin | 16,821                   | 31.1%      | 37,337       | 68.9%      | 26                 | 36.1%      | 46     | 63.9%      | 4,178,924        | 73.5%      | 1,508,062  | 26.5%      |                                                                                          |
| UIC (2013)                | County             | 1-2                                                   | 3-12           | USA       | 978,308                  | 27.7%      | 2,553,597    | 72.3%      | 1,167              | 37.1%      | 1,976  | 62.9%      | 262,452,132      | 85.0%      | 46,293,406 | 15.0%      | Mobley 2019 <sup>16</sup><br>Cole 2013 <sup>17</sup><br>Baldwin 2013 <sup>18</sup>       |
|                           |                    |                                                       |                | Midwest   | 182,601                  | 24.3%      | 567,922      | 75.7%      | 302                | 28.6%      | 753    | 71.4%      | 51,690,737       | 77.2%      | 15,236,264 | 22.8%      |                                                                                          |
|                           |                    |                                                       |                | Wisconsin | 16,821                   | 31.1%      | 37,337       | 68.9%      | 26                 | 36.1%      | 46     | 63.9%      | 4,178,924        | 73.5%      | 1,508,062  | 26.5%      |                                                                                          |
| NCHS URCSC (2013)         | County             | 1-4                                                   | 5-6            | USA       | 978,308                  | 27.7%      | 2,553,597    | 72.3%      | 1,167              | 37.1%      | 1,976  | 62.9%      | 262,452,132      | 85.0%      | 46,293,406 | 15.0%      | Garcia 2019 <sup>19</sup><br>Callaghan 2018 <sup>20</sup>                                |
|                           |                    |                                                       |                | Midwest   | 182,601                  | 24.3%      | 567,922      | 75.7%      | 302                | 28.6%      | 753    | 71.4%      | 51,690,737       | 77.2%      | 15,236,264 | 22.8%      |                                                                                          |
|                           |                    |                                                       |                | Wisconsin | 16,821                   | 31.1%      | 37,337       | 68.9%      | 26                 | 36.1%      | 46     | 63.9%      | 4,178,924        | 73.5%      | 1,508,062  | 26.5%      |                                                                                          |
| CBSA (2013)               | County             | Metro Statistical Area<br>Micro Statistical Area      | Non-core       | USA       | 1,674,010                | 47.4%      | 1,857,895    | 52.6%      | 1,808              | 57.5%      | 1,335  | 42.5%      | 289,606,345      | 93.8%      | 19,139,193 | 6.2%       | Yaghjian 2019<br>Tran 2019 <sup>21</sup><br>Hashibe 2018 <sup>22</sup>                   |
|                           |                    |                                                       |                | Midwest   | 343,220                  | 45.7%      | 407,302      | 54.3%      | 534                | 50.6%      | 521    | 49.4%      | 60,583,984       | 90.5%      | 6,343,017  | 9.5%       |                                                                                          |
|                           |                    |                                                       |                | Wisconsin | 27,836                   | 51.4%      | 26,321       | 48.6%      | 40                 | 55.6%      | 32     | 44.4%      | 4,957,944        | 87.2%      | 729,042    | 12.8%      |                                                                                          |
| IRR (2010)                | County             | Set: < 0.5000                                         | Set: >= 0.5000 | USA       | 877,936                  | 24.9%      | 2,652,796    | 75.1%      | 1,162              | 37.0%      | 1,979  | 63.0%      | 273,069,268      | 88.5%      | 35,521,346 | 11.5%      | Cohen 2017 <sup>23</sup><br>Waldorf 2015                                                 |
|                           |                    |                                                       |                | Midwest   | 179,070                  | 23.9%      | 571,452      | 76.1%      | 309                | 29.3%      | 746    | 70.7%      | 55,588,772       | 83.1%      | 11,338,229 | 16.9%      |                                                                                          |
|                           |                    |                                                       |                | Wisconsin | 18,579                   | 34.3%      | 35,579       | 65.7%      | 29                 | 40.3%      | 43     | 59.7%      | 4,631,271        | 81.4%      | 1,055,715  | 18.6%      |                                                                                          |

Rural-Urban classification indexes in use in current cancer research and the amount and percentage of total land area, number of geographical units, and population that each index allocates to urban and rural codes. Indexes include Urban Rural Classification of Urban Areas and Urban Clusters (UACE), Frontier and Remote Area Codes (FAR), Rural-Urban Commuting Area (RUCA), ZIP Code Tabulation Area Rural-Urban Commuting Area (RUCA(z)), Rural-Urban Continuum Codes (RUCC), Urban Influence Codes (UIC), National Center for Health Statistics (NCHS) Urban-Rural Classification Scheme for Counties, Core Based Statistical Areas (CBSA), and Index of Relative Rurality (IRR). RUCA codes are divided into rural and urban groupings based on 2 separate processes, represented as option 1 and option 2 for each the census-tract and ZCTA-based codes. The year in parentheses indicates the version of the index that was used. Midwest states include North Dakota, South Dakota, Nebraska, Kansas, Minnesota, Iowa, Missouri, Wisconsin, Illinois, Michigan, Indiana, and Ohio.

**Supporting Table 2.** Agreement Between Binary and Ternary Rural-Urban Indexes Across Census Tracts, Land Area, and Population for the United States and UW Health Pancreatic Cancer Registry Patients

|                     |                              |                            |                                             | Land Area (square miles) |         |                          | Census Tracts |           |                          | Population  |         |                          | Registry Patients* |         |                          |
|---------------------|------------------------------|----------------------------|---------------------------------------------|--------------------------|---------|--------------------------|---------------|-----------|--------------------------|-------------|---------|--------------------------|--------------------|---------|--------------------------|
| Variable Type       | Indexes Included             | Agreement and Disagreement | Rural - Urban Category                      | Count                    | Percent | % agree- or disagreement | Count         | Percent   | % agree- or disagreement | Count       | Percent | % agree- or disagreement | Count              | Percent | % agree- or disagreement |
| Binary              | RUCC, UIC, NCHS, IRR, RUCA   | Agree                      | Metropolitan                                | 535,871                  | 15.2%   | 78.7%                    | 57,051        | 78.4%     | 88.3%                    | 247,994,082 | 80.3%   | 88.8%                    | 908                | 59.0%   | 73.4%                    |
|                     |                              |                            | Non-metropolitan                            | 2,242,865                | 63.5%   |                          | 7,242         | 10.0%     |                          | 26,248,722  | 8.5%    |                          | 222                | 14.4%   |                          |
|                     |                              | Disagree                   | Metropolitan & Non-metropolitan             | 751,869                  | 21.3%   | 21.3%                    | 8,448         | 11.6%     | 11.6%                    | 34,347,840  | 11.1%   | 11.1%                    | 408                | 26.5%   | 26.5%                    |
| Binary              | RUCC & RUCA                  | Agree                      | Metropolitan                                | 676,901                  | 19.2%   | 86.6%                    | 58,050        | 79.8%     | 94.5%                    | 252,306,164 | 81.7%   | 94.9%                    | 920                | 59.8%   | 91.0%                    |
|                     |                              |                            | Non-Metropolitan                            | 2,382,706                | 67.5%   |                          | 10,742        | 14.8%     |                          | 40,789,077  | 13.2%   |                          | 480                | 31.2%   |                          |
|                     |                              | Disagree                   | Metropolitan & Non-metropolitan             | 472,171                  | 13.4%   | 13.4%                    | 3,987         | 5.5%      | 5.5%                     | 15,650,297  | 5.1%    | 5.1%                     | 138                | 9.0%    | 9.0%                     |
| Ternary             | RUCC, UIC, NCHS, IRR, RUCA   | Agree                      | Metropolitan                                | 535,871                  | 15.2%   | 41.3%                    | 57,051        | 78.4%     | 81.8%                    | 247,994,082 | 80.3%   | 83.4%                    | 908                | 59.0%   | 60.4%                    |
|                     |                              |                            | Micropolitan                                | 250,702                  | 7.1%    |                          | 2,104         | 2.9%      |                          | 8,722,475   | 2.8%    |                          | 21                 | 1.4%    |                          |
|                     |                              |                            | Rural/Noncore                               | 672,911                  | 19.1%   |                          | 399           | 0.5%      |                          | 886,289     | 0.3%    |                          | 1                  | 0.1%    |                          |
|                     |                              | Disagree (1 level)         | Metropolitan & Micropolitan                 | 353,001                  | 10.0%   | 47.3%                    | 5,610         | 7.7%      | 14.2%                    | 24,208,656  | 7.8%    | 13.2%                    | 244                | 15.9%   | 28.8%                    |
|                     |                              |                            | Micropolitan & Rural/Noncore                | 1,319,251                | 37.4%   |                          | 4,739         | 6.5%      |                          | 16,639,958  | 5.4%    |                          | 200                | 13.0%   |                          |
|                     |                              | Disagree (2 levels)        | Metropolitan & Rural/Noncore                | 186,851                  | 5.3%    | 5.3%                     | 1,421         | 2.0%      | 2.0%                     | 4,639,840   | 1.5%    | 1.5%                     | 28                 | 1.8%    | 1.8%                     |
|                     |                              | Disagree (all levels)      | Metropolitan, Micropolitan, & Rural/Noncore | 212,017                  | 6.0%    | 6.0%                     | 1,417         | 1.9%      | 1.9%                     | 5,499,314   | 1.8%    | 1.8%                     | 136                | 8.8%    | 8.8%                     |
| Ternary             | RUCC & RUCA                  | Agree                      | Metropolitan                                | 676,901                  | 19.2%   | 54.1%                    | 58,050        | 79.8%     | 88.3%                    | 252,306,164 | 88.4%   | 88.8%                    | 920                | 59.8%   | 74.9%                    |
|                     |                              |                            | Micropolitan                                | 405,347                  | 11.5%   |                          | 5,071         | 7.0%      |                          | 405,347     | 0.1%    |                          | 184                | 12.0%   |                          |
|                     |                              |                            | Rural/Noncore                               | 827,415                  | 23.4%   |                          | 1,177         | 1.6%      |                          | 827,415     | 0.3%    |                          | 49                 | 3.2%    |                          |
|                     |                              | Disagree (1 level)         | Metropolitan & Micropolitan                 | 201,571                  | 5.7%    | 38.3%                    | 2,484         | 3.4%      | 9.6%                     | 10,777,424  | 3.8%    | 9.5%                     | 87                 | 5.7%    | 21.7%                    |
|                     |                              |                            | Micropolitan & Rural/Noncore                | 1,149,944                | 32.6%   |                          | 4,494         | 6.2%      |                          | 16,270,060  | 5.7%    |                          | 247                | 16.0%   |                          |
| Disagree (2 levels) | Metropolitan & Rural/Noncore | 270,599                    | 7.7%                                        | 7.7%                     | 1,503   | 2.1%                     | 2.1%          | 4,872,873 | 1.7%                     | 1.7%        | 51      | 3.3%                     | 3.3%               |         |                          |

\* RUCA(z) was used in place of RUCA for the Registry Patients since patient ZIP codes were available in the registry and census tracts were not.

Count and percent agreement of census tracts, land area (square miles), population, and Registry patients across Rural-Urban Continuum Codes (RUCC), Urban Influence Codes (UIC), National Center for Health Statistics (NCHS) Urban-Rural Classification Scheme for Counties, Index of Relative Rurality (IRR), Rural-Urban Commuting Area (RUCA), and ZIP Code Tabulation Area Rural-Urban Commuting Area (RUCA(z)) when those indexes are treated as binary and ternary rural-urban variables. The Index of Relative Rurality was missing data for 0.1% of the US Population and Registry Patients.

Supporting Figure 1. Comparison of Rural-Urban Indexes by Land Area and Geographical Unit Distributions

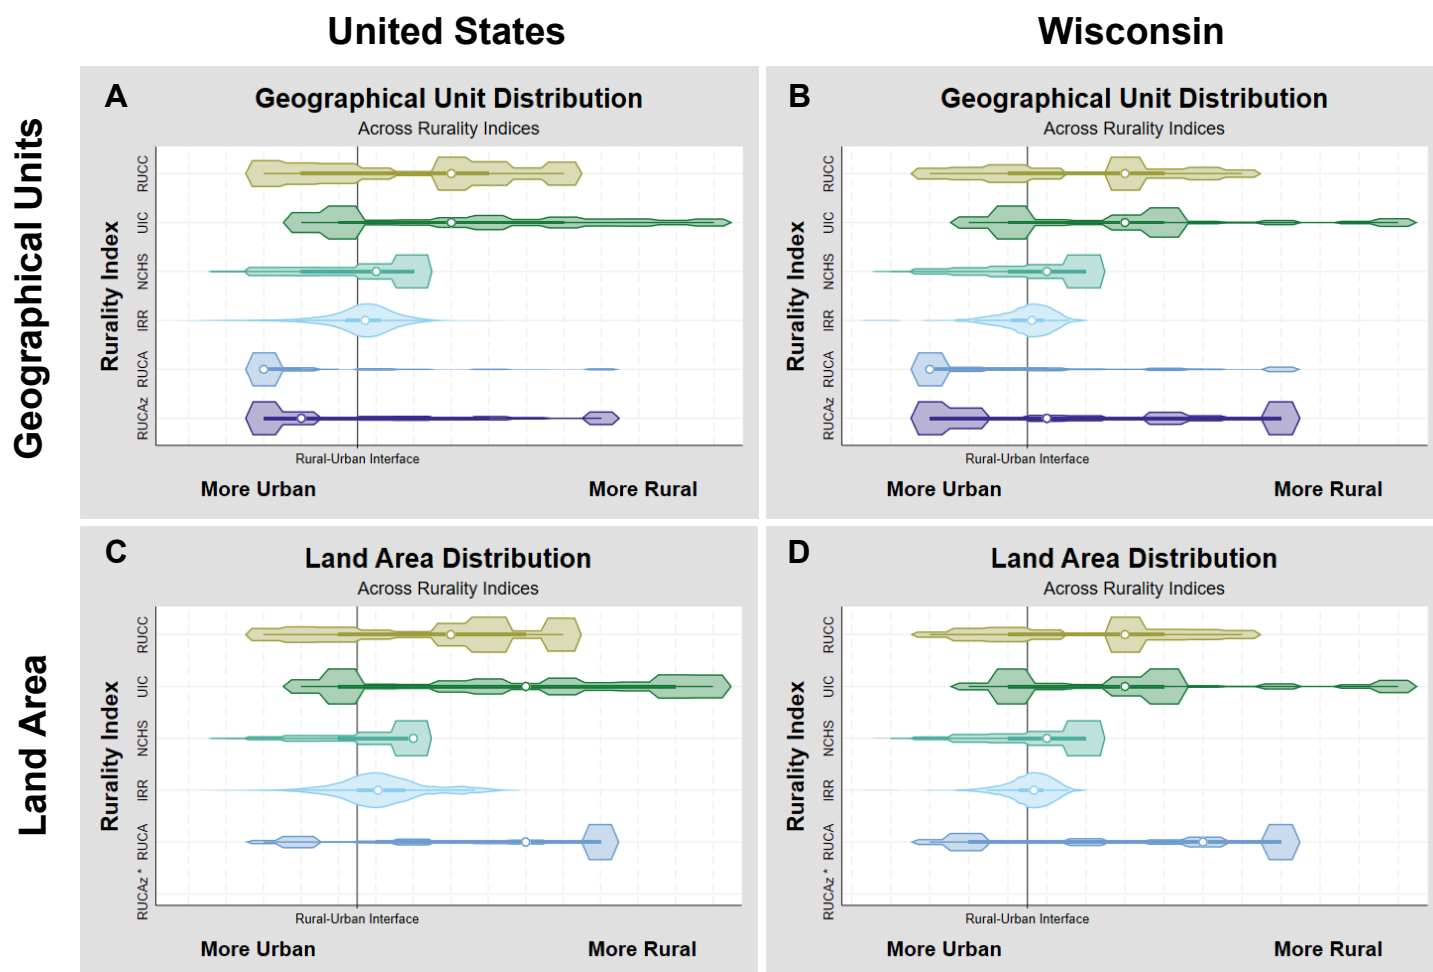

Geographical unit is measured at the county-level for Rural-Urban Continuum Codes (RUCC), Urban Influence Codes (UIC), National Center for Health Statistics (NCHS) Urban-Rural Classification Scheme for Counties, and Index of Relative Rurality (IRR), census-tract level for Rural-Urban Commuting Area (RUCA), and ZIP Code Tabulation Area (ZCTA) level for ZCTA Rural-Urban Commuting Area (RUCA(z)) for the United States (A) and Wisconsin (B). Land area distributions are shown for the United States (C) and Wisconsin (D). Each index is standardized such that the 'Rural-Urban Interface' line lies between those values that the index has designated as urban (left of line) and rural (right of line). Center points indicate the median of the index, boxes indicate the inter-quartile range, and spikes indicate the upper- and lower-adjacent values (1.5 times the inter-quartile range).

\* RUCA(z) is based on 2013 ZCTAs. Land Area data is not available at the ZCTA-level for 2013, so those distributions are excluded from the figure.

Supporting Figure 2. Geographical Unit Distributions Over Time Across the United States, Wisconsin, and UW Health Pancreatic Cancer Registry Patients

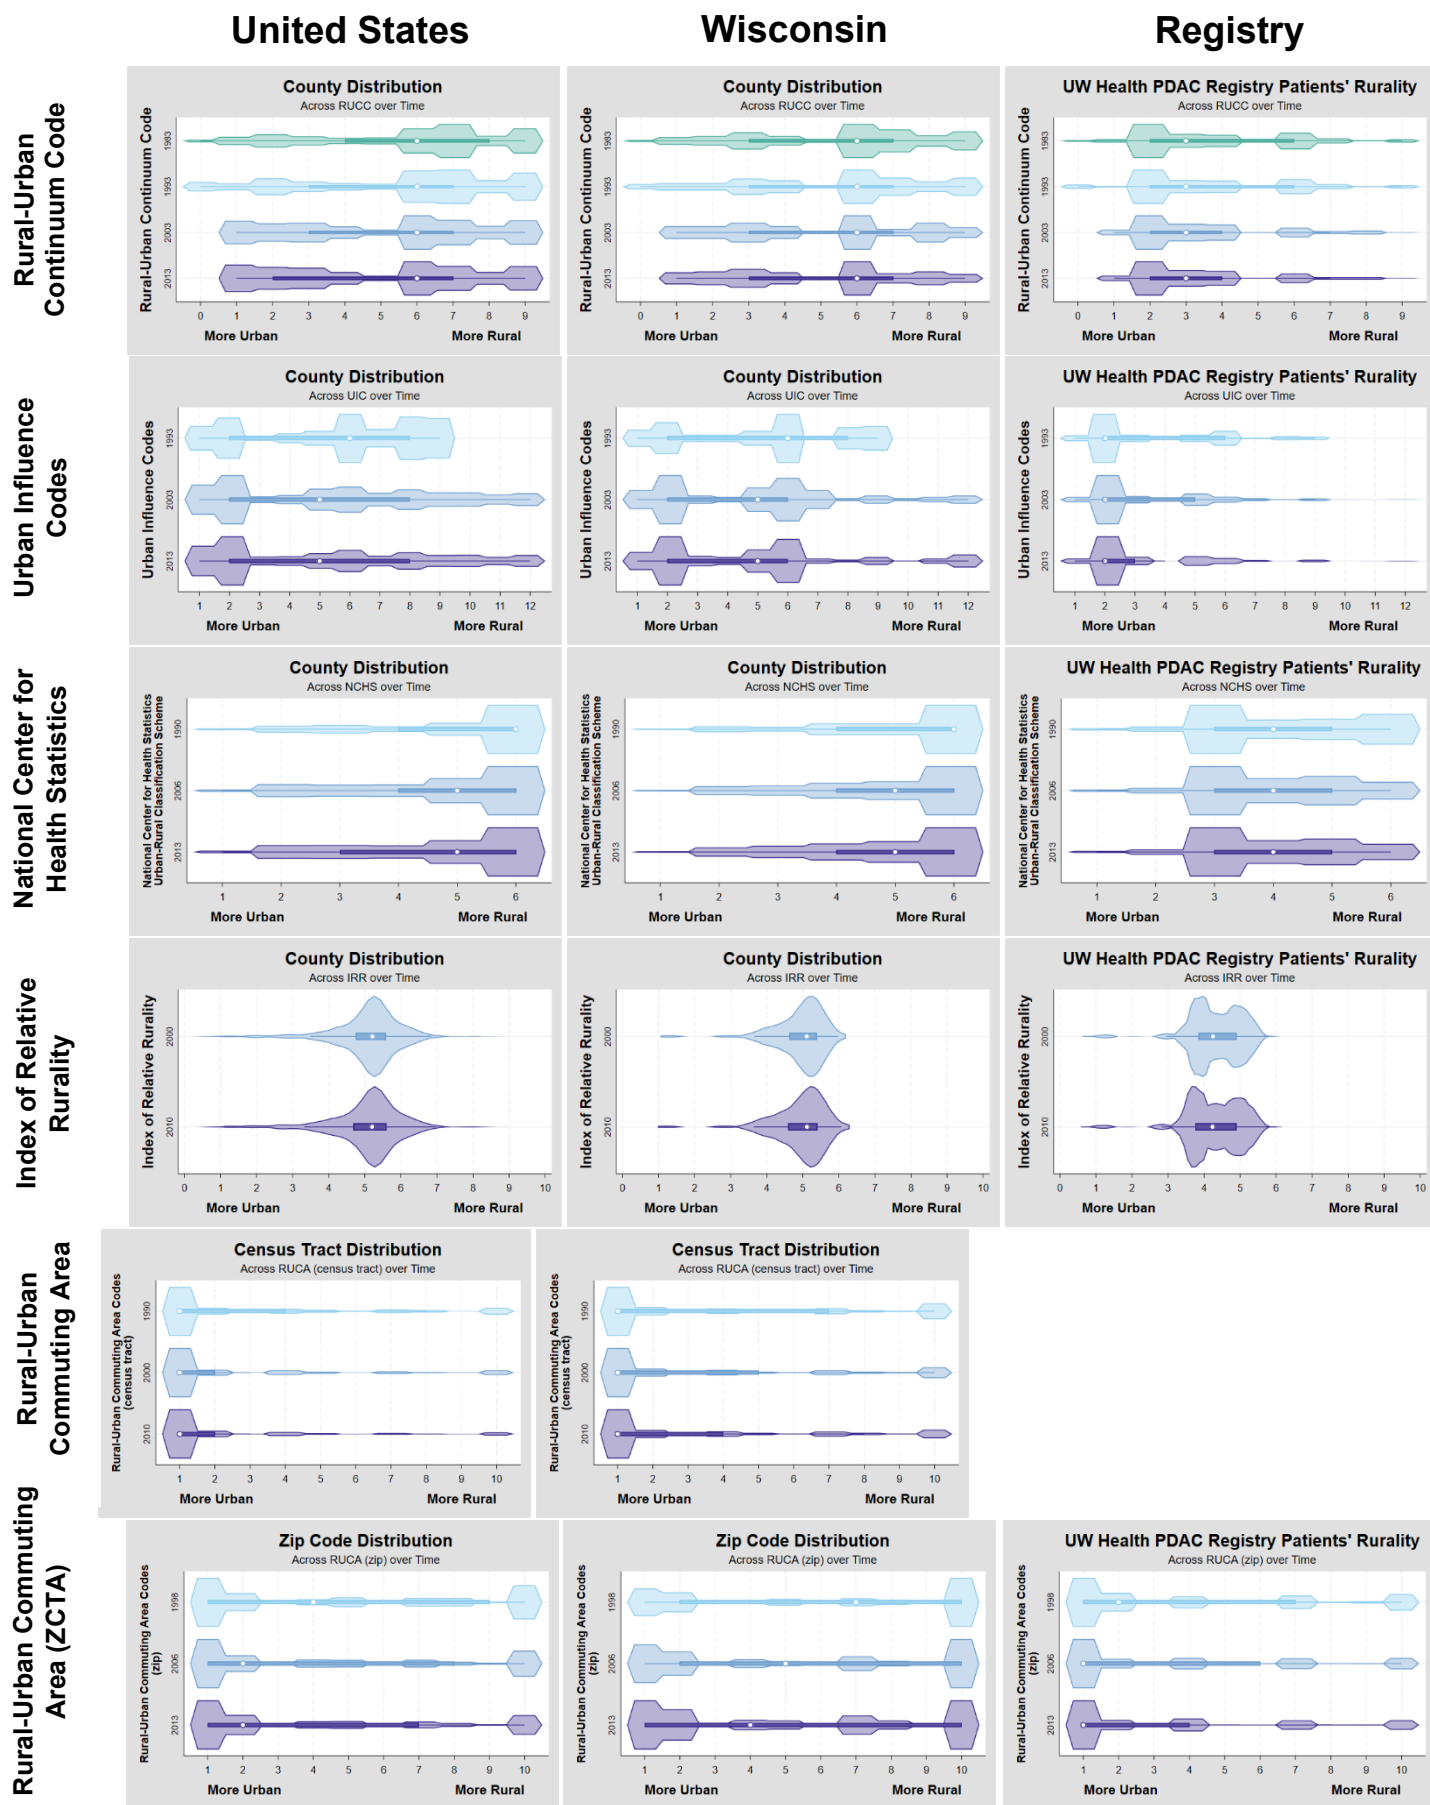

Geographical unit is measured at the county-level for Rural-Urban Continuum Codes (RUCC), Urban Influence Codes (UIC), National Center for Health Statistics (NCHS) Urban-Rural Classification Scheme for Counties, and Index of Relative Rurality (IRR), census tract level for Rural-Urban Commuting Area (RUCA), and ZIP Code Tabulation Area (ZCTA) level for ZCTA Rural-Urban Commuting Area (RUCA(z)). Center points indicate the median of the index, boxes indicate the inter-quartile range, and spikes indicate the upper- and lower-adjacent values (1.5 times the inter-quartile range). Changes in the RUCC and UIC ranges are a result of changes in their respective methodologies.
